# Supplementary material for: Efficient protein production inspired by how spiders make silk
Source: PubMed Central journal article supplement (PMC5457526; doi:10.1038/ncomms15504), 2017-05-23
Supplement: ncomms15504-s1.pdf [file ncomms15504-s1.pdf]

## SUPPLEMENTARY FIGURES

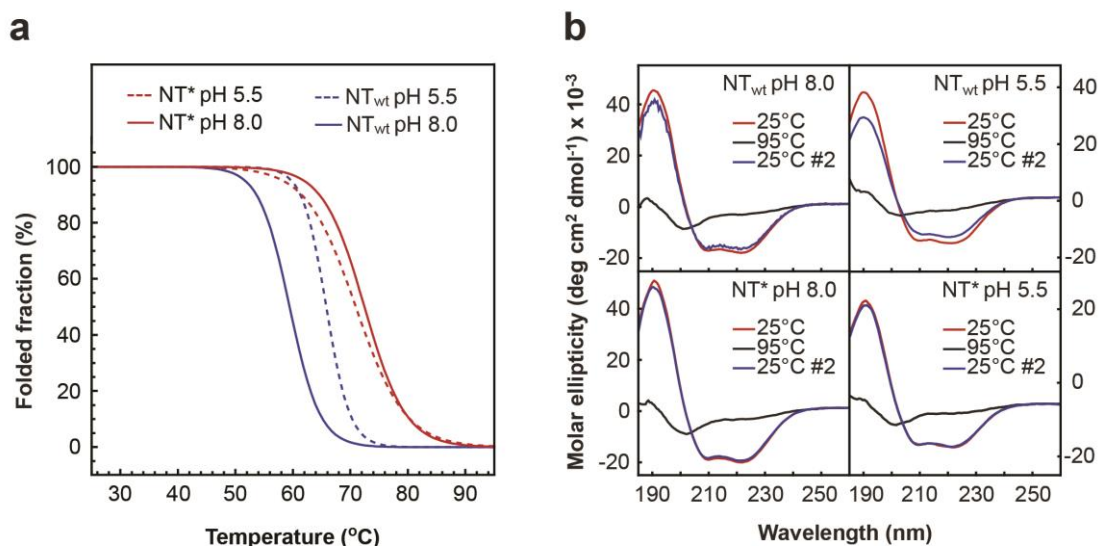

**Supplementary Figure 1: CD spectroscopy measurement of stability and refolding capacity.** (a) The CD signal at 222 nm was converted to fraction folded, as described in the Methods section, plotted as a function of temperature (°C) and fitted to a two-state unfolding model to obtain the melting temperatures ( $T_m$ ) at the equilibration points. The obtained  $T_m$  values were 59.4 °C or 65.8 °C for NT<sub>wt</sub> at pH 8.0 (blue solid line) or pH 5.5 (blue dotted line), respectively, and 72.4 °C or 70.9 °C for NT\* at pH 8.0 (red solid line) or pH 5.5 (red dotted line), respectively. (b) The molar ellipticity was scanned from 185 nm to 260 nm at 25 °C (red), 95 °C (black), and again at 25 °C after cooling (blue) at pH 8.0 and pH 5.5 for NT<sub>wt</sub> (upper panels) and NT\* (lower panels). The graphs represent smoothed averages of four measurements.

**NT<sub>wt</sub>**

SHTTPWTPNPLAENFMNSFMQGLSSMPGFTASQLDDMSTIAQSMVQSIQSLAAQGRTPNKLQALN  
MAFASSMAEIAASEEGGSLSTKTSSIASAMSN AFLQTTGVVNQPFINEITQLVSMFAQAGMNDVSA

**NT\***

SHTTPWTPNPLAENFMNSFMQGLSSMPGFTASQLDKMSTIAQSMVQSIQSLAAQGRTPNDLQALN  
MAFASSMAEIAASEEGGSLSTKTSSIASAMSN AFLQTTGVVNQPFINEITQLVSMFAQAGMNDVSA

**NT\*-rSP-C33Leu**

MGHHHHHMSHTTPWTPNPLAENFMNSFMQGLSSMPGFTASQLDKMSTIAQSMVQSIQSLAAQGR  
TSPNDLQALNMAFASSMAEIAASEEGGSLSTKTSSIASAMSN AFLQTTGVVNQPFINEITQLVSMFAQ  
AGMNDVSAGNSMIPSSPVHLKRLKLLLLLLLLLILGALLGL

**NT\*-rKL4**

MGHHHHHMSHTTPWTPNPLAENFMNSFMQGLSSMPGFTASQLDKMSTIAQSMVQSIQSLAAQGR  
TSPNDLQALNMAFASSMAEIAASEEGGSLSTKTSSIASAMSN AFLQTTGVVNQPFINEITQLVSMFAQ  
AGMNDVSAGNSMKLLLLKLLLLKLLLLK

**NT\*-rfhSP-D**

MGHHHHHMSHTTPWTPNPLAENFMNSFMQGLSSMPGFTASQLDKMSTIAQSMVQSIQSLAAQGR  
TSPNDLQALNMAFASSMAEIAASEEGGSLSTKTSSIASAMSN AFLQTTGVVNQPFINEITQLVSMFAQ  
AGMNDVSAGNSLEALFQGPPIGEGCEKGEGERGPPGLPAHLDEELQATLHDFRHHQIQTRGALS  
LQGSIMTVGEKVFSSNGQSITFDAIQEACARAGGRIAVPRNPEENEAIASFVKYNTYAYVGLTEGSPSP  
DFRYSDDGTPVNYTNWYRGEPA GRGKEQCVEMYTDGQWDRNCLYSRLTICEF

**NT\*-rCCK-58**

MGHHHHHMSHTTPWTPNPLAENFMNSFMQGLSSMPGFTASQLDKMSTIAQSMVQSIQSLAAQGR  
TSPNDLQALNMAFASSMAEIAASEEGGSLSTKTSSIASAMSN AFLQTTGVVNQPFINEITQLVSMFAQ  
AGMNDVSAGNSLEALFQGVSRQTDGESRAHLGALLARYIQQARKAPSGRMSIVKNLQNLDP SHRISD  
RDYMGWMDF

**NT\*-rAβ1-42**

MGHHHHHMSHTTPWTPNPLAENFMNSFMQGLSSMPGFTASQLDKMSTIAQSMVQSIQSLAAQGR  
TSPNDLQALNMAFASSMAEIAASEEGGSLSTKTSSIASAMSN AFLQTTGVVNQPFINEITQLVSMFAQ  
AGMNDVSAGNSENLYFQDAEFRHDSGYEVHHQKLVFFAEDVGSNKGAIIGLMVGGVVIA

**NT\*-rhCAP-18**

MGHHHHHMSHTTPWTPNPLAENFMNSFMQGLSSMPGFTASQLDKMSTIAQSMVQSIQSLAAQGR  
TSPNDLQALNMAFASSMAEIAASEEGGSLSTKTSSIASAMSN AFLQTTGVVNQPFINEITQLVSMFAQ  
AGMNDVSAGNSLVPRGSQVLSYKEAVLRAIDGINQRSSDANLYRLLDLP RPPTMDGDPDTPKPV SFT  
VKETVCPRTTQQSPEDCDFKDKGLVKRCMGTVTLNQARGSFDISCDKDNKRFALLGDFFRKSKEKIG  
KEFKRIVQRIKDFLRNLVPRTES

**NT\*-c-Myc-rβ17**

MGHHHHHMSHTTPWTPNPLAENFMNSFMQGLSSMPGFTASQLDKMSTIAQSMVQSIQSLAAQGR  
TSPNDLQALNMAFASSMAEIAASEEGGSLSTKTSSIASAMSN AFLQTTGVVNQPFINEITQLVSMFAQ  
AGMNDVSAGNSLVPRGSMGEQKLISEEDLGMQISMDYEIKFHGDGDNFDLNLDDSGGDLQLQIRGP  
GGRVHVHIIHSSSGKVDHFVNNDGGDVEVKMH

**NT\*-rSP-C<sub>ss</sub>**

MGHHHHHMSHTTPWTPNPLAENFMNSFMQGLSSMPGFTASQLDKMSTIAQSMVQSIQSLAAQGR  
TSPNDLQALNMAFASSMAEIAASEEGGSLSTKTSSIASAMSN AFLQTTGVVNQPFINEITQLVSMFAQ  
AGMNDVSAGNSMFGIPSSPVHLKRLLI VVVVVVLI VVVIVGALLGL

**Supplementary Figure 2: Amino acid sequences of NT<sub>wt</sub>, NT\* and fusion proteins.** The His<sub>6</sub> affinity purification tag is shown in orange, NT is shown in grey, and the fused target peptides or proteins are shown in green. Cleavage sites for CNBr (M), 3C protease (LEALFQG), tobacco etch virus (TEV) protease (ENLYFQ) or thrombin (LVPRGS) are underlined in the fusion proteins. The D40K and K65D mutations are shown in red in the sequence corresponding to NT\*.

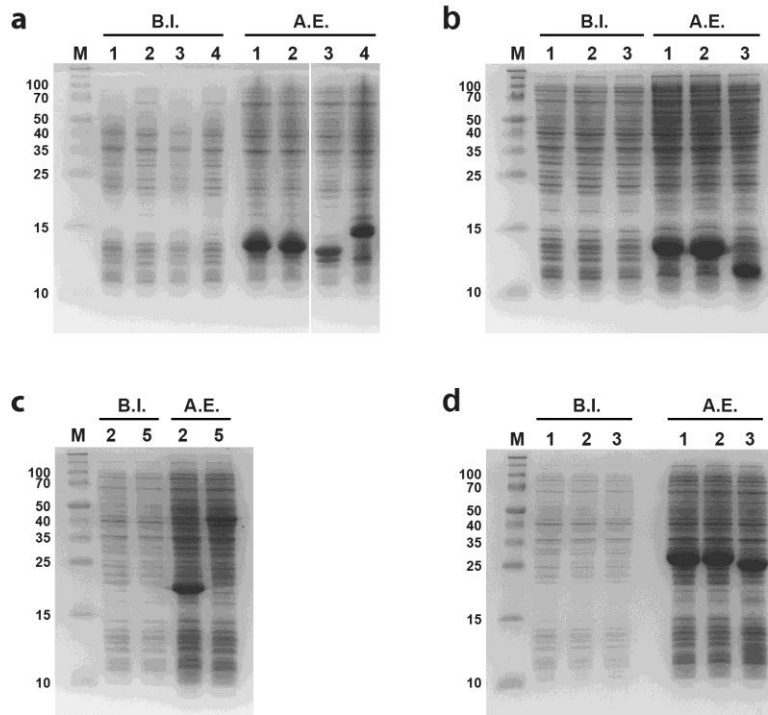

**Supplementary Figure 3: Expression analysis of fusion proteins.** Target peptides or proteins were fused C-terminally of NT<sub>wt</sub> (1), NT\* (2), PGB1 (3), Trx (4) or MBP (5). SDS-PAGE samples were taken before induction (B.I.) and after over-night expression (A.E.) of (a) rSP-C33Leu, (b) rKL4, (c) rCCK58 and (d) rfhSP-D fusion proteins. The molecular weights in kDa of a protein standard (lane M) are given to the left of each gel figure..

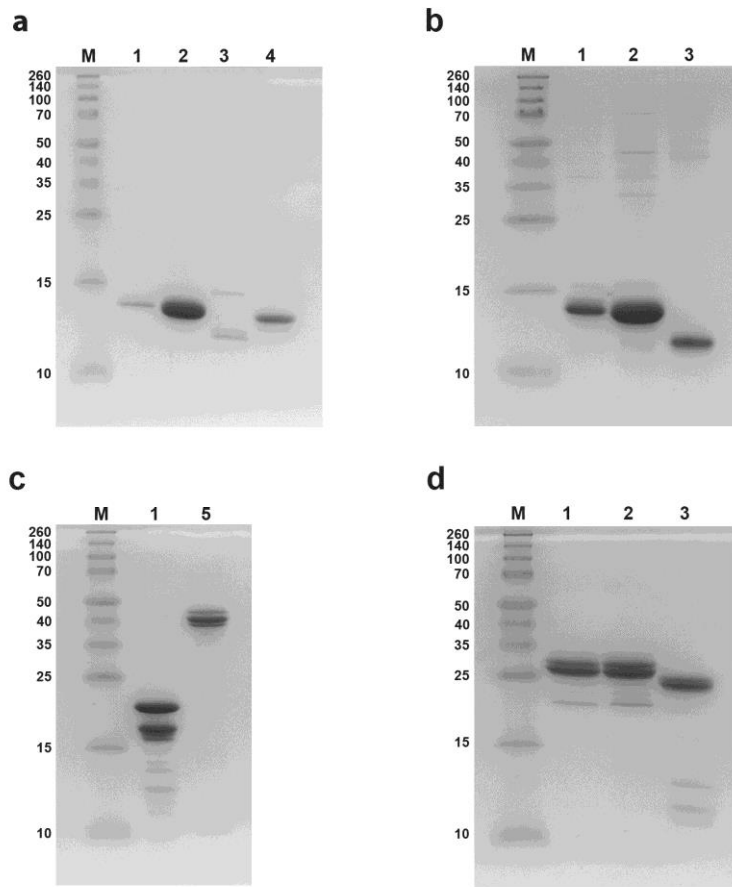

**Supplementary Figure 4: Comparative purification of fusion proteins.** Target peptides or proteins were fused C-terminally of NT<sub>wt</sub> (1), NT\* (2), PGB1 (3), Trx (4) or MBP (5). Fusion proteins were purified on Ni-sepharose using identical protocols and SDS-PAGE analysis of the purified protein fraction is shown for (a) rSP-C33Leu, (b) rKL4, (c) rCCK58 and (d) rfhSP-D fusion proteins. The molecular weights in kDa of a protein standard (lane M) are given to the left of each gel figure.

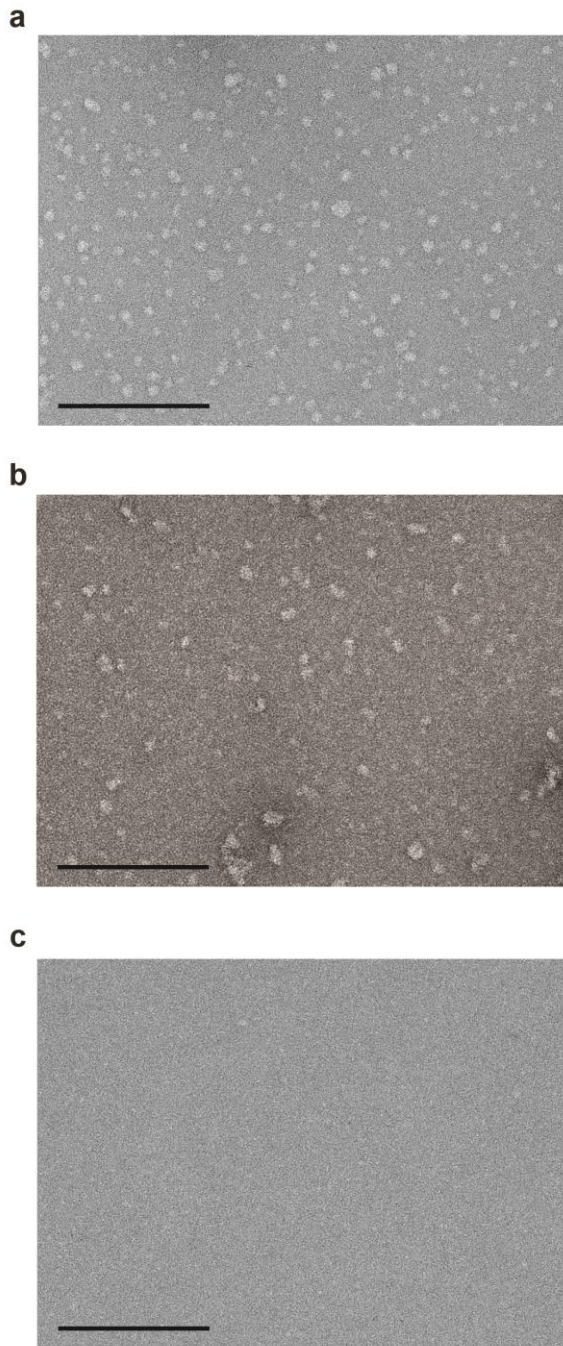

**Supplementary Figure 5: NT\* in fusion with TM peptides arranges into micelle-like particles.** TEM of negatively stained (a) NT\*-rSP-C33Leu fusion protein and (b) NT\*-rKL4 fusion protein shows 10-15 nm particles. (c) TEM of negatively stained NT\* at the same concentration served as negative control. Scale bar = 200 nm.



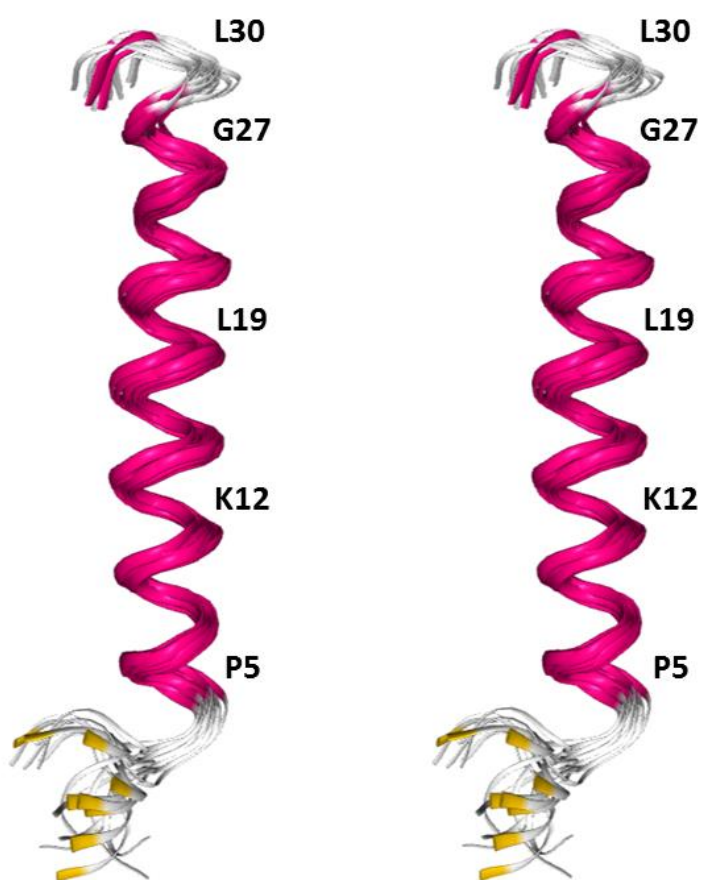

**Supplementary Figure 7: Structural characterization of rSP-C33Leu.** Stereo view of the 20 best energy-refined conformers representing the three-dimensional structure of rSpC-33Leu in organic solvent.

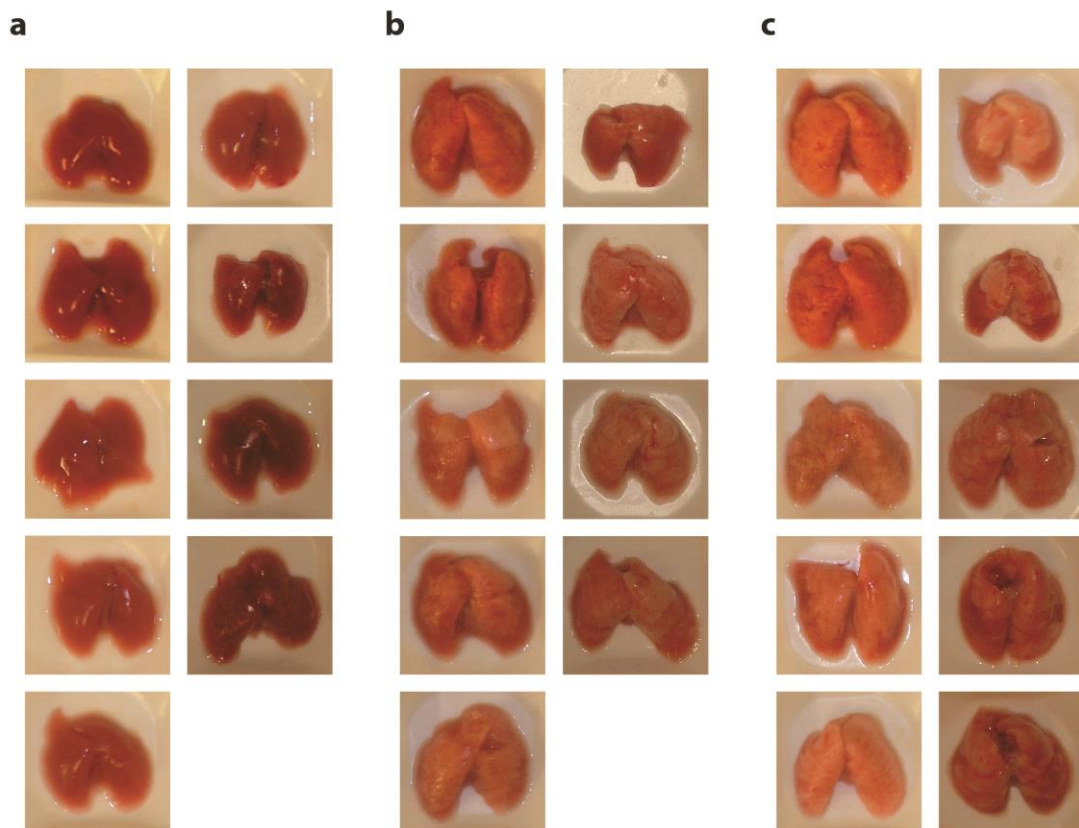

**Supplementary Figure 8: Lung appearances after treatment with 2% rSP-C33Leu in DPPC:POPG or Curosurf<sup>®</sup>.** Photographs are shown of whole lungs from all included animals in the (a) non-treated control group, (b) after treatment with 2% rSP-C33Leu in DPPC:POPG (68:31) or (c) treatment with Curosurf<sup>®</sup>.



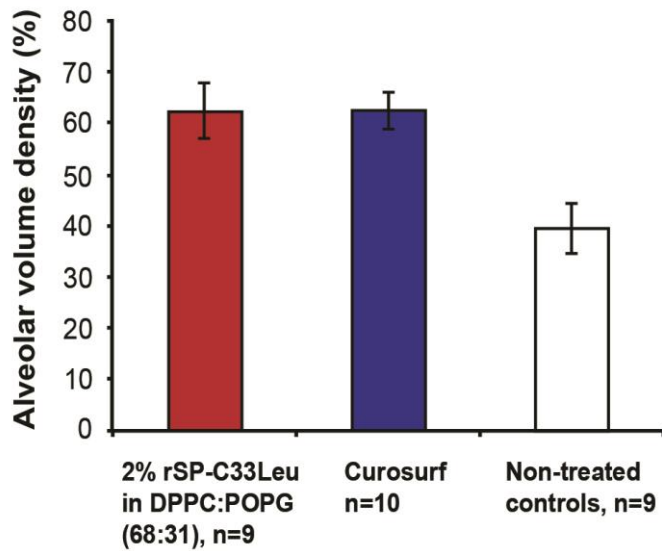

**Supplementary Figure 9: Alveolar volume density measured by computer-aided image analysis of excised lungs.** Preterm newborn rabbits treated with 2% rSP-C33Leu in DPPC:POPG (68:31) compared to Curosurf<sup>®</sup> treated or non-treated controls. The bars represent mean values  $\pm$  s.d. as indicated by error bars and n denotes the number of animals. Treatment with 2% rSP-C33Leu in DPPC:POPG resulted in alveolar volume densities equal to the positive control Curosurf<sup>®</sup> and both differed significantly from non-treated controls (Newman-Keuls test,  $p < 0.0005$ ).

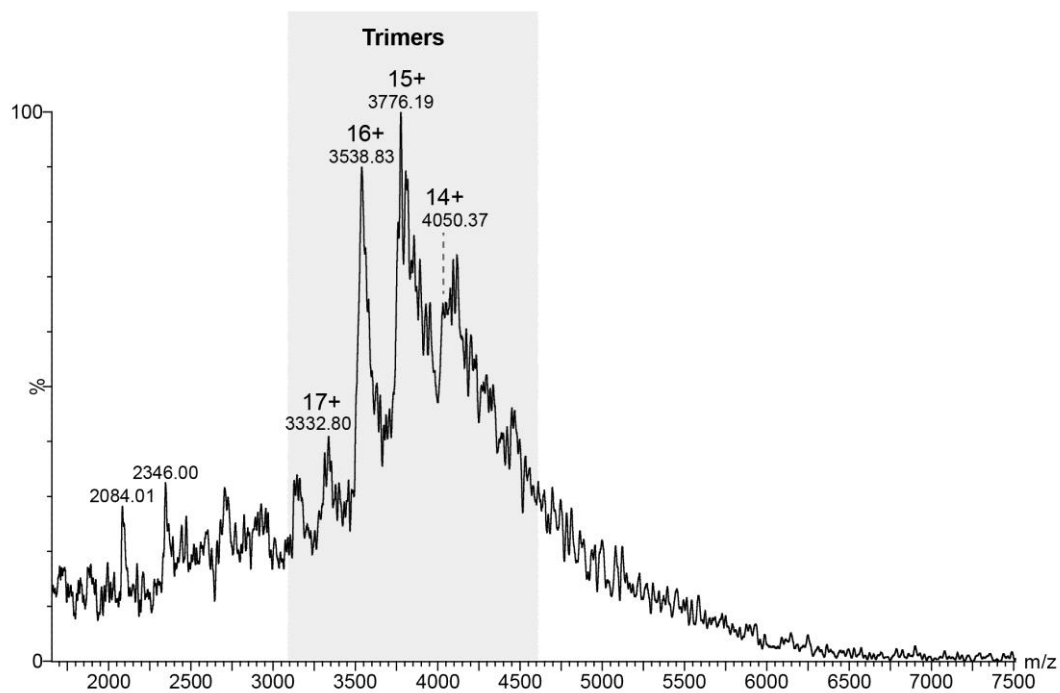

**Supplementary Figure 10: ESI-MS spectrum of rfhSP-D.** The spectrum was recorded on SEC separated rfhSP-D from the main eluting peak and shows predominantly trimers with 15-16 charges.

## SUPPLEMENTARY TABLES

**Supplementary Table 1:** Protein yields after Ni-Sepharose purification of proteins and peptides in fusion with different solubility tags

| Target protein                   | Fusion partner       | Purified fusion protein yield (mg per L culture) <sup>a</sup> | Reference <sup>b</sup> |
|----------------------------------|----------------------|---------------------------------------------------------------|------------------------|
| rSP-C33Leu                       | NT*                  | 284                                                           |                        |
|                                  | NT <sub>wt</sub>     | 93                                                            |                        |
|                                  | PGB1                 | 56                                                            |                        |
|                                  | Trx                  | 43                                                            |                        |
| rKL4                             | NT*                  | 428                                                           |                        |
|                                  | NT <sub>wt</sub>     | 212                                                           |                        |
|                                  | PGB1                 | 56                                                            |                        |
| rSP-C <sub>ss</sub> <sup>c</sup> | NT*                  | 59                                                            |                        |
|                                  | SN                   | 4                                                             | Ref <sup>1</sup>       |
| rfhSP-D                          | NT*                  | 276                                                           |                        |
|                                  | NT <sub>wt</sub>     | 221                                                           |                        |
|                                  | PGB1                 | 160                                                           |                        |
| rCCK-58                          | NT*                  | 142                                                           |                        |
|                                  | MBP                  | 53                                                            |                        |
| rhCAP18                          | NT*                  | 14                                                            |                        |
|                                  | NT <sub>wt</sub>     | 14                                                            |                        |
| rA $\beta$ 1-40                  | NT*                  | 200                                                           |                        |
|                                  | (NANP) <sub>19</sub> | 100                                                           | Ref <sup>2</sup>       |
|                                  | IFABP                | 40                                                            | Ref <sup>3</sup>       |
|                                  | GST                  | 95                                                            | Ref <sup>4</sup>       |
| rA $\beta$ 1-42                  | NT*                  | 174                                                           |                        |
|                                  | (NANP) <sub>19</sub> | 100                                                           | Ref <sup>2</sup>       |
|                                  | GST                  | 46                                                            | Ref <sup>5</sup>       |
|                                  | GST                  | 9                                                             | Ref <sup>6</sup>       |
|                                  | IFABP                | 40                                                            | Ref <sup>3</sup>       |
|                                  | Ub                   | 25                                                            | Ref <sup>7</sup>       |
| r $\beta$ 17                     | NT*                  | 228                                                           |                        |
|                                  | PGB1                 | 92                                                            |                        |

<sup>a</sup> The yields were calculated for purified fusion protein before removal of the solubility tag

<sup>b</sup> Data without a literature reference were determined in this study

<sup>c</sup> Compared to an SP-C analogue with the two Cys residues exchanged for Phe instead of Ser

**Supplementary Table 2:**  $^1\text{H}$  chemical shift values for rSP-C33Leu solubilized in  $\text{CDCl}_3/\text{CD}_3\text{OD}/0.1\text{M HCl}$  32:64:5 (v/v) at 25 °C

| Residue | NH   | $\alpha\text{H}$ | $\beta\text{H}$ | Others                                                                                                         |
|---------|------|------------------|-----------------|----------------------------------------------------------------------------------------------------------------|
| Ile 1   | ni   | 4.11             | ni              | $\gamma\text{CH}_2$ 1.26; $\gamma\text{CH}_3$ 1.12                                                             |
| Pro 2   | -    | 4.50             | 2.12; 2.32      | $\gamma\text{CH}_2$ 2.03; $\delta\text{CH}_2$ 3.69; 3.83                                                       |
| Ser 3   | 8.11 | 4.47             | 3.82; 3.93      | -                                                                                                              |
| Ser 4   | 8.42 | 4.78             | 3.96; 4.16      | -                                                                                                              |
| Pro 5   | -    | 4.36             | 2.19; 2.43      | $\gamma\text{CH}_2$ 2.04; 2.09; $\delta\text{CH}_2$ 4.00; 4.06                                                 |
| Val 6   | 7.71 | 3.72             | 2.13            | $\gamma\text{CH}_3$ 0.98; 1.07                                                                                 |
| His 7   | 7.92 | 4.61             | 3.44; 3.49      | $\text{H}\delta_2$ 7.47; $\text{H}\epsilon_1$ 8.84                                                             |
| Leu 8   | 8.12 | 4.04             | 1.78; 1.85      | $\delta\text{CH}_3$ 0.98                                                                                       |
| Lys 9   | 8.12 | 3.95             | 1.98; 2.03      | $\gamma\text{CH}_2$ 1.68; $\delta\text{CH}_2$ 1.76; $\epsilon\text{CH}_2$ 2.95; $\zeta\text{NH}_2$ 7.99        |
| Arg 10  | 8.08 | 4.05             | 1.98; 2.04      | $\gamma\text{CH}_2$ 1.67; $\delta\text{CH}_2$ 3.26; 3.31; $\epsilon\text{NH}_2$ 7.54                           |
| Leu 11  | 8.02 | 4.05             | ni              | $\delta\text{CH}_3$ 0.90                                                                                       |
| Lys 12  | 8.15 | 3.91             | 1.98, 2.04      | $\gamma\text{CH}_2$ 1.45 ; $\delta\text{CH}_2$ 1.69; 1.75; $\epsilon\text{CH}_2$ 2.91; $\zeta\text{NH}_2$ 8.02 |
| Leu 13  | 7.99 | 4.11             | 1.76; 1.87      | $\delta\text{CH}_3$ 0.97                                                                                       |
| Leu 14  | 8.11 | 4.09             | 1.81; 1.91      | $\delta\text{CH}_3$ 0.96; 0.98                                                                                 |
| Leu 15  | 8.24 | 4.08             | 1.92            | $\text{H}\gamma$ 1.66; $\delta\text{CH}_3$ 0.93                                                                |
| Leu 16  | 8.07 | 4.10             | 1.86            | $\delta\text{CH}_3$ 0.96                                                                                       |
| Leu 17  | 8.24 | 4.09             | 1.86            | $\delta\text{CH}_3$ 0.97                                                                                       |
| Leu 18  | 8.31 | 4.06             | 1.93            | $\text{H}\gamma$ 1.74; $\delta\text{CH}_3$ 0.94                                                                |
| Leu 19  | 8.18 | 4.08             | 1.83; 1.88      | $\delta\text{CH}_3$ 0.95                                                                                       |
| Leu 20  | 8.26 | 4.06             | 1.86; 1.93      | $\delta\text{CH}_3$ 0.94                                                                                       |
| Ile 21  | 8.31 | 3.66             | 2.10            | $\gamma\text{CH}_2$ 1.17; $\gamma\text{CH}_3$ 0.97; $\delta\text{CH}_3$ 0.89                                   |
| Leu 22  | 8.28 | 4.06             | 1.94            | $\delta\text{CH}_3$ 0.94                                                                                       |
| Leu 23  | 8.44 | 4.06             | 1.98; 2.07      | $\text{H}\gamma$ 1.60; $\delta\text{CH}_3$ 0.92                                                                |
| Leu 24  | 8.36 | 4.13             | 1.97; 2.11      | $\text{H}\gamma$ 1.62; $\delta\text{CH}_3$ 0.92                                                                |
| Ile 25  | 8.42 | 3.69             | 2.08            | $\gamma\text{CH}_2$ 1.11; $\gamma\text{CH}_3$ 0.95; $\delta\text{CH}_3$ 0.88                                   |
| Leu 26  | 8.64 | 4.07             | 1.72; 1.87      | $\delta\text{CH}_3$ 0.94                                                                                       |
| Gly 27  | 8.56 | 3.75; 3.83       | -               | -                                                                                                              |
| Ala 28  | 8.06 | 4.08             | 1.57            | -                                                                                                              |
| Leu 29  | 8.29 | 4.17             | 2.06            | $\text{H}\gamma$ 1.61; $\delta\text{CH}_3$ 0.93                                                                |
| Leu 30  | 8.32 | 4.14             | 1.99            | $\text{H}\gamma$ 1.60; $\delta\text{CH}_3$ 0.93                                                                |
| Leu 31  | 7.67 | 4.35             | 1.67; 1.91      | $\delta\text{CH}_3$ 0.90                                                                                       |
| Gly 32  | 7.93 | 3.87; 4.04       | -               | -                                                                                                              |
| Leu 33  | 7.97 | 4.50             | 1.59; 1.70      | $\delta\text{CH}_3$ 0.89; 0.94                                                                                 |

**For methylene and isopropyl groups two chemical shifts are given only when two resonance lines could be identified. ni, not identified.**

**Supplementary Table 3:** Survival and compliance for preterm newborn rabbits treated with either 200 mg kg<sup>-1</sup> (80 mg mL<sup>-1</sup>) of Curosurf<sup>®</sup> or 2% rSP-C33Leu in DPPC:POPG (68:31) and ventilated for 4 hours.

| <b>Surfactant</b>     | <b>Compliance (mL/(kg x cmH<sub>2</sub>O))</b> | <b>Survival</b> |
|-----------------------|------------------------------------------------|-----------------|
| Curosurf <sup>®</sup> | 0.48 ± 0.14                                    | 12/13           |
| 2% rSP-C33Leu         | 0.40 ± 0.09                                    | 12/13           |

Rabbits (gestational age 29 days, term 31 days) were ventilated for 4 hours with individual pressures to keep tidal volumes between 6–7 mL kg<sup>-1</sup> and survival and compliance at the end of experiments were registered. Compliance is given as mean ± SD.

**Supplementary Table 4:** *In vitro* surface activity of suspensions (10 mg mL<sup>-1</sup>) containing Curosurf<sup>®</sup> or 2% rSP-C33Leu in DPPC:POPG (68:31) measured in a captive bubble surfactometer.

| <b>Sample, n=3 for all preparations</b> | <b>Compression needed to reach 5 mN m<sup>-1</sup> (area, %)</b> | <b><math>\gamma_{\min}</math> (mN m<sup>-1</sup>)</b> | <b><math>\gamma_{\max}</math> (mN m<sup>-1</sup>)</b> |
|-----------------------------------------|------------------------------------------------------------------|-------------------------------------------------------|-------------------------------------------------------|
| Curosurf <sup>®</sup>                   | 16* (9-17)                                                       | 1.7 (1.1-1.7)                                         | 25* (25-29)                                           |
| 2% rSP-C33Leu                           | 26 (21-27)                                                       | 1.3 (0.8-1.8)                                         | 34 (32-38)                                            |

Compression is measured as the difference in bubble area between maximum surface tension and when surface tension less or equal to 5 mN m<sup>-1</sup> is reached. Presented values for minimum and maximum surface tensions are from the fifth cycle of quasi-static dynamics. Values are given as median (range). Significant differences are indicated with one (\*) asterisk (t-test, p < 0.05).

## SUPPLEMENTARY REFERENCES

1. Lukovic, D. et al. Production and characterisation of recombinant forms of human pulmonary surfactant protein C (SP-C): Structure and surface activity. *Biochim. Biophys. Acta* **1758**, 509-518 (2006).
2. Finder, V.H., Vodopivec, I., Nitsch, R.M. & Glockshuber, R. The recombinant amyloid-beta peptide Abeta1-42 aggregates faster and is more neurotoxic than synthetic Abeta1-42. *J. Mol. Biol.* **396**, 9-18 (2010).
3. Garai, K., Crick, S.L., Mustafi, S.M. & Frieden, C. Expression and purification of amyloid-beta peptides from Escherichia coli. *Protein Expr. Purif.* **66**, 107-112 (2009).
4. Long, F., Cho, W. & Ishii, Y. Expression and purification of <sup>15</sup>N- and <sup>13</sup>C-isotope labeled 40-residue human Alzheimer's beta-amyloid peptide for NMR-based structural analysis. *Protein Expr. Purif.* **79**, 16-24 (2011).
5. Chhetri, G., Pandey, T., Chinta, R., Kumar, A. & Tripathi, T. An improved method for high-level soluble expression and purification of recombinant amyloid-beta peptide for in vitro studies. *Protein Expr. Purif.* **114**, 71-76 (2015).
6. Zhang, L. et al. Expression, purification, and characterization of recombinant human beta-amyloid42 peptide in Escherichia coli. *Protein Expr. Purif.* **64**, 55-62 (2009).
7. Lee, E.K., Hwang, J.H., Shin, D.Y., Kim, D.I. & Yoo, Y.J. Production of recombinant amyloid-beta peptide 42 as an ubiquitin extension. *Protein Expr. Purif.* **40**, 183-189 (2005).
